# Supplementary material for: Questioning the Ubiquity of Neofunctionalization
Source: PLOS journal article supplement (doi:10.1371/journal.pcbi.1000252), 2009-01-02
Supplement: S1 (10.1371/journal.pcbi.1000252.s001) [file journal.pcbi.1000252.s001]

# Text S1: Supporting Information for Questioning the ubiquity of neofunctionalization

November 11, 2008

**Proof:**  $\Delta C_{\text{homomer}} > \Delta C_{\text{simple}}$  for networks with at least one triangle

The clustering coefficient is defined as:

$$C = \frac{3T}{\Gamma}$$

where  $T$  is the number of triangles and  $\Gamma$  is the number of connected triples. A triangle is three fully-connected nodes and a connected triple is a node connected to an unordered pair of other nodes (i.e., a path of length 2) [1]. For simplicity, we associate a connected triple with its middle node. The number of connected triples is calculated for a network with  $N$  proteins by:

$$\Gamma = \sum_{i=1}^N \frac{k_i(k_i - 1)}{2}$$

where  $k_i$  is the number of neighbors, or degree, of protein  $i$ .

For a single, simple duplication, the new clustering coefficient is calculated as:

$$\frac{3(T + t_p)}{\Gamma + \gamma_p + \sum k_g}$$

The progeny protein acquires the same number of triangles and connected triples as the progenitor ( $t_p$  and  $\gamma_p = \frac{k_p(k_p-1)}{2}$  respectively). Additionally, each of the progenitor's neighbors  $g = \{1..k_p\}$  gain  $k_g$  connected triples due to the additional edge the progeny contributes to each neighbor (Figure 7): That is, the connected triples gained by all neighbors due to simple duplication equal  $\sum_{g=1}^{k_p} k_g$ .

If the duplicated protein is self-interacting, it acquires all of the triangles and connected triples of its non-self-interacting counterpart, plus  $k_p$  additional triangles and  $2k_p$  additional connected triples (Figure 7):

$$\frac{3(T + t_p + k_p)}{\Gamma + \gamma_p + \sum k_g + 2k_p}$$

To prove: the post-duplication clustering coefficient is greater if the duplicated protein is homomeric.

$$\frac{3(T + t_p + k_p)}{\Gamma + \gamma_p + \sum k_g + 2k_p} \stackrel{?}{>} \frac{3(T + t_p)}{\Gamma + \gamma_p + \sum k_g}$$

establish a common denominator:

$$(T + t_p + k_p)(\Gamma + \gamma_p + \sum k_g) \stackrel{?}{>} (T + t_p)(\Gamma + \gamma_p + \sum k_g + 2k_p)$$

multiply out and remove like terms  $T$  and  $t_p$ :

$$k_p\Gamma + k_p\gamma_p + k_p \sum k_g \stackrel{?}{>} 2Tk_p + 2t_pk_p$$

finally, divide out  $k_p$ :

$$\Gamma + \gamma_p + \sum_{g=1}^{k_p} k_g \stackrel{?}{>} 2T + 2t_p$$

By the definition of the clustering coefficient,  $\Gamma \geq 3T$ . In the non-trivial case of networks with at least one triangle,  $\Gamma > 2T$ . For the remaining terms note that  $\sum k_g \geq k_p$  since each neighbor of  $p$  has degree at least one ( $p$  is a neighbor). Additionally, each progenitor triangle,  $t_p$ , increases the degree of two neighbors by 1 since an edge must connect two neighbors to form the triangle. Therefore,  $\sum k_g \geq 2t_p + k_p$ . The inequality holds:

$$\Delta C_{\text{homomer}} > \Delta C_{\text{simple}}$$

## References

- [1] Newman ME (2001) The structure of scientific collaboration networks. Proc Natl Acad Sci U S A 98: 404–409.
